# Supplementary material for: Hyperparameter optimization of convolutional neural networks using particle swarm optimization for diabetic retinopathy detection
Source: PeerJ journal article supplement (doi:10.7717/peerj-cs.3273), 2025-11-07
Supplement: Table_S1.docx [file Table_S1.docx]

**Table 1: Distribution of samples according to the severity level of diabetic retinopathy.**

| Severity Level | Class label | Number of Samples | Percentage |
| --- | --- | --- | --- |
| NO DR | 0 | 1805 | 50% |
| Mild | 1 | 370 | 10% |
| Moderate | 2 | 999 | 27% |
| Severe | 3 | 193 | 5% |
| Proliferative | 4 | 295 | 8% |
