# Supplementary material for: Hyperparameter optimization of convolutional neural networks using particle swarm optimization for diabetic retinopathy detection
Source: PeerJ journal article supplement (doi:10.7717/peerj-cs.3273), 2025-11-07
Supplement: Table_S2.docx [file Table_S2.docx]

**Table 2: Initial Hyperparameters for Transfer Learning Models**

| **Parameters** | **Ranges** |
| --- | --- |
| Input size | 224 × 224 × 3 |
| Output size | 5 |
| Optimizer | Adam |
| Activation Function | Softmax |
| Number of epochs | 40 |
| Activation function for activation layer | ReLU |
| Dropout | 0.4 |
| Loss function | Categorical Crossentropy |
| Batch size | 32 |
| Learning rate | 0.00001 |
