# Supplementary material for: Hyperparameter optimization of convolutional neural networks using particle swarm optimization for diabetic retinopathy detection
Source: PeerJ journal article supplement (doi:10.7717/peerj-cs.3273), 2025-11-07
Supplement: Table_S3.docx [file Table_S3.docx]

**Table 3: The Performance Metrics for the baseline pretrained CNN Architectures.**

| **Models** | **Accuracy** | **Precision** | **Recall** | **F1-score** | **Kappa Score** |
| --- | --- | --- | --- | --- | --- |
| VGG-16 | 73.7 | 73.6 | 73.7 | 73.0 | 67.1 |
| DenseNet-121 | **93.85** | **93.78** | **93.85** | **93.77** | **92.30** |
| MobileNet | *92.79* | *92.71* | *92.79* | *92.72* | *90.99* |
