# Supplementary material for: Hyperparameter optimization of convolutional neural networks using particle swarm optimization for diabetic retinopathy detection
Source: PeerJ journal article supplement (doi:10.7717/peerj-cs.3273), 2025-11-07
Supplement: Table_S4.docx [file Table_S4.docx]

**Table 4: The Performance Metrics for the PSO-CNN Architectures.**

| **Models** | **Accuracy** | **Precision** | **Recall** | **F1-score** | **Kappa Score** |
| --- | --- | --- | --- | --- | --- |
| PSO-VGG16 | 76.62 | 76.72 | 76.62 | 76.62 | 70.77 |
| PSO-DenseNet121 | *96.34* | *96.34* | *96.34* | *96.34* | *95.42* |
| PSO-MobileNet | **97.41** | **97.41** | **97.41** | **97.41** | **96.77** |
