# Supplementary material for: Hyperparameter optimization of convolutional neural networks using particle swarm optimization for diabetic retinopathy detection
Source: PeerJ journal article supplement (doi:10.7717/peerj-cs.3273), 2025-11-07
Supplement: Table_S5.docx [file Table_S5.docx]

**Table 5: Proposed CNN hyper-parameters by PSO-VGG16**

| **VGG-16** | |
| --- | --- |
| Hyper-parameters  *[ N, D, L]* | Accuracy |
| [273, 0.5, 0.0004] | 48.7 |
| [409, 0.3, 0.0008] | 50.9 |
| [342, 0.1, 0.0008] | 55.1 |
| [332, 0.7, 0.0005] | 69.5 |
| [211, 0.4, 0.0001] | 70.6 |
| [281, 0.1, 0.0008] | 73.1 |
| [378, 0.8, 0.0003] | 73.3 |
| [319, 0.7, 0.0005] | 73.6 |
| [205, 0.4, 0.0001] | 76.0 |
| **[273, 0.5, 0.0004]** | **76.5** |
| **Best Values of *[N, D, L]* = [273, 0.5, 0.0004]** | |
