# Supplementary material for: Hyperparameter optimization of convolutional neural networks using particle swarm optimization for diabetic retinopathy detection
Source: PeerJ journal article supplement (doi:10.7717/peerj-cs.3273), 2025-11-07
Supplement: Table_S6.docx [file Table_S6.docx]

**Table 6: Proposed CNN hyper-parameters by PSO- DenseNet121**

| **DenseNet121** | |
| --- | --- |
| Hyper-parameters  *[ N, D, L]* | Accuracy |
| [90, 0.6, 0.0009] | 64.8 |
| [304, 0.6, 0.0001] | 81.1 |
| [329, 0.3, 0.0009] | 95.9 |
| [188, 0.8, 0.0006] | 94.9 |
| [294, 0.3, 0.0009] | 95.7 |
| **[32, 0.6, 0.0009]** | **96.1** |
| [247, 0.3, 0.0009] | 95.9 |
| [233, 0.3, 0.0001] | 96.01 |
| [167, 0.2, 0.0008] | 95.7 |
| [229, 0.8, 0.0006] | 96.6 |
| **Best Values of *[N, D, L]* = [32, 0.6, 0.0009]** | |
