# Supplementary material for: Hyperparameter optimization of convolutional neural networks using particle swarm optimization for diabetic retinopathy detection
Source: PeerJ journal article supplement (doi:10.7717/peerj-cs.3273), 2025-11-07
Supplement: Table_S7.docx [file Table_S7.docx]

**Table 7: Proposed CNN hyper-parameters by PSO-MobileNetV2**

| **MobileNetV2** | |
| --- | --- |
| Hyper-parameters  *[ N, D, L]* | Accuracy |
| [118, 0.5, 0.0008] | 67.4 |
| [333, 0.1, 0.0003] | 77.5 |
| [74, 0.7, 0.0003] | 85.8 |
| [108, 0.3, 0.0009] | 96.01 |
| [439, 0.6, 0.0007] | 95.7 |
| [303, 0.3, 0.0004] | 96.1 |
| [135, 0.5, 0.0008] | 97.06 |
| [459, 0.1, 0.0003] | 96.7 |
| [41, 0.8, 0.0007] | 97.1 |
| **[237, 0.3, 0.0004]** | **97.1** |
| **Best Values of *[N, D, L]* = [237, 0.3, 0.0004]** | |
