# Supplementary material for: Hyperparameter optimization of convolutional neural networks using particle swarm optimization for diabetic retinopathy detection
Source: PeerJ journal article supplement (doi:10.7717/peerj-cs.3273), 2025-11-07
Supplement: Table_S8.docx [file Table_S8.docx]

**Table 8: Performance metrics for transfer learning models and algorithms.**

| **Transfer Learning Model** | **Metric** | **Algorithm** | |
| --- | --- | --- | --- |
| **GA** | **PSO** |
| **VGG-16** | Accuracy  Precision  Recall  F1-score  Kappa score | 89.30  89.30  89.30  89.25  86.61 | 76.62  76.72  76.62  76.62  70.77 |
| **DenseNet-121** | Accuracy  Precision  Recall  F1-score  Kappa score | 94.45  94.41  94.45  94.41  93.07 | 96.34  96.34  96.34  96.34  95.42 |
| **MobieNetV2** | Accuracy  Precision  Recall  F1-score  Kappa score | 88.03  87.8  88.03  87.9  85.03 | 97.41  97.41  97.41  97.41  96.77 |
