# Supplementary material for: Hyperparameter optimization of convolutional neural networks using particle swarm optimization for diabetic retinopathy detection
Source: PeerJ journal article supplement (doi:10.7717/peerj-cs.3273), 2025-11-07
Supplement: Table_S9.docx [file Table_S9.docx]

**Table 9.** Comparison with recent works.

| **Reference** | **Dataset Used** | **CNN Model** | **Accuracy (%)** |
| --- | --- | --- | --- |
| (Bodapati et al., 2020) | Aptos 2019 | VGG16, Xception | 80.96 |
| (Kale and Sharma, 2023) | Aptos 2019 | VGG16 and VGG19 | 87.31 |
| (Shaban et al., 2020) | Aptos 2019 | CNN | 89 |
| (Lahmar and Idri, 2022) | Aptos 2019 | VGG16 and MobileNetV2 | 85.89, 93.09 |
| (AbdelMaksoud et al., 2020) | Aptos 2019 | DenseNet121 | 86.5 |
| (Taufiqurrahman et al., 2020) | Aptos 2019 | MobileNetV2+SVM | 85 |
| (Raja Sarobin M and Panjanathan, 2022) | Aptos 2019 | Modified of Xception | 83.09 |
|  |  | CNN with DenseNet and ResNet | 93.18 |
| **GA (Proposed Model)** | Aptos 2019 | GA-VGG16 | 89.30 |
|  |  | GA-DenseNet121 | 94.45 |
|  |  | GA-MobileNetV2 | 88.03 |
| **PSO (Proposed Model)** | Aptos 2019 | PSO-VGG16 | 76.62 |
|  |  | PSO-DenseNet121 | 96.34 |
|  |  | PSO-MobileNetV2 | 97.41 |
